# Supplementary material for: The “solid-state” ring-opening cationic polymerization of 1,3,5-trioxane: frozen polymerization for suppression of oligomer formation and synthesis of ultrahigh molecular weight polymers
Source: Royal Society of Chemistry journal article supplement (doi:10.1039/d0py01401j), 2020-12-17
Supplement: d0py01401j1.pdf [file d0py01401j1.pdf]

**Electronic Supplementary Information for:**  
**The "solid-state" ring-opening cationic polymerization of 1,3,5-trioxane:**  
**Frozen polymerization for suppression of oligomer formation and**  
**synthesis of ultrahigh molecular weight polymers**

*Chihiro Suemitsu,<sup>a,b</sup> Arihiro Kanazawa,<sup>a</sup> and Sadahito Aoshima<sup>a\*</sup>*

<sup>a</sup> Department of Macromolecular Science, Graduate School of Science, Osaka University,  
Toyonaka, Osaka 560-0043, Japan.

<sup>b</sup> Asahi Kasei Corporation, Kawasaki, Kanagawa 210-0863, Japan

**Contents:**

**Figure S1.** The experimental method of "frozen polymerization"

**Figure S2.** MALDI-TOF-MS spectrum of a POM copolymer sample obtained under conditions similar to those for molten-state homopolymerization of TOX

**Figure S3.** MWD curves of the polymers obtained in the molten-state polymerizations of TOX

**Figure S4.** <sup>1</sup>H NMR spectra of the polymers obtained in the molten-state polymerization (polymerization temperature: 90 °C), frozen polymerization (90 °C → 4 °C), and solid-state polymerization (50 °C)

**Figure S5.** Enlarged view of temperature transition in polymerization systems

**Table S1.** Reproducibility of molten-state polymerization and frozen polymerization

**Figure S6.** The relationships between reaction time and temperature of reaction mixture; reaction time and yield; reaction time and  $M_w$ ; temperature of reaction mixture and yield plot; and temperature of reaction mixture and  $M_w$  plot in the molten-state polymerization and frozen polymerization of TOX

**Figure S7.** MWD curves of the polymers obtained by heating the reaction mixture for 1—10 min at 140 °C without quenching frozen polymerization of TOX

**Figure S8.** The experimental method of solid-state polymerization

**Figure S9.** Two-dimensional pattern of WAXS and SAXS of the polymers obtained in the solid-state polymerization

**Figure S10.** SEM images of the polymers obtained in the solid-state polymerization

### Frozen polymerization method

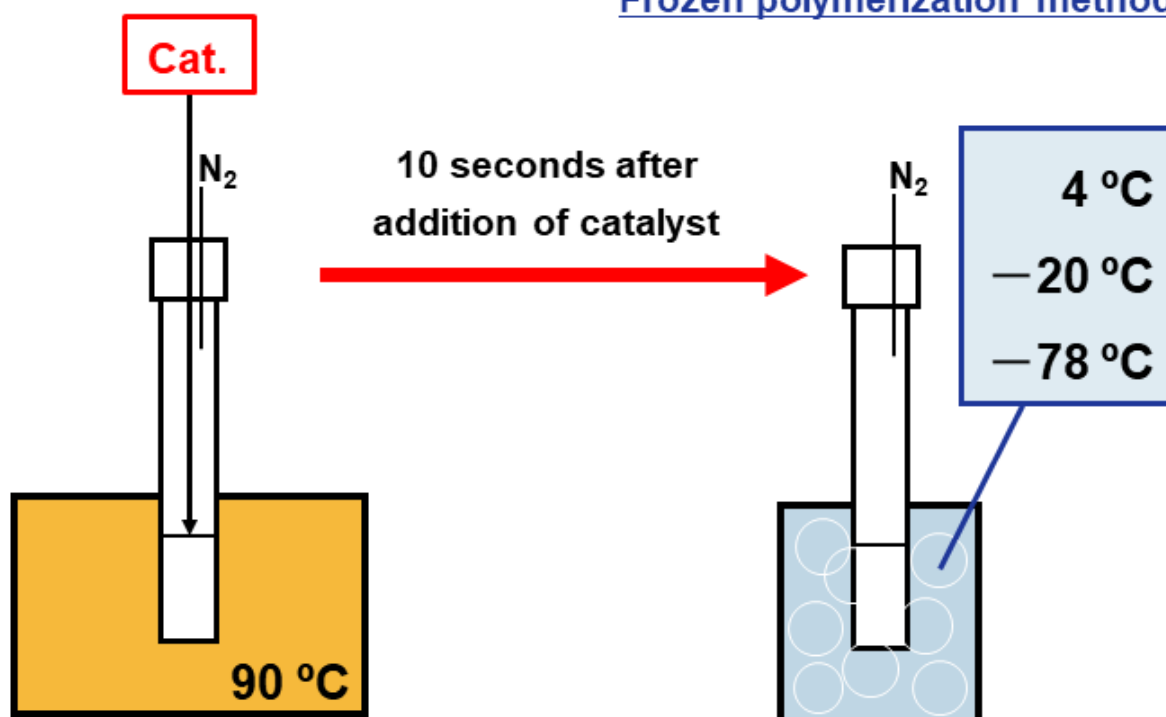

**Figure S1.** The experimental method of "frozen polymerization".

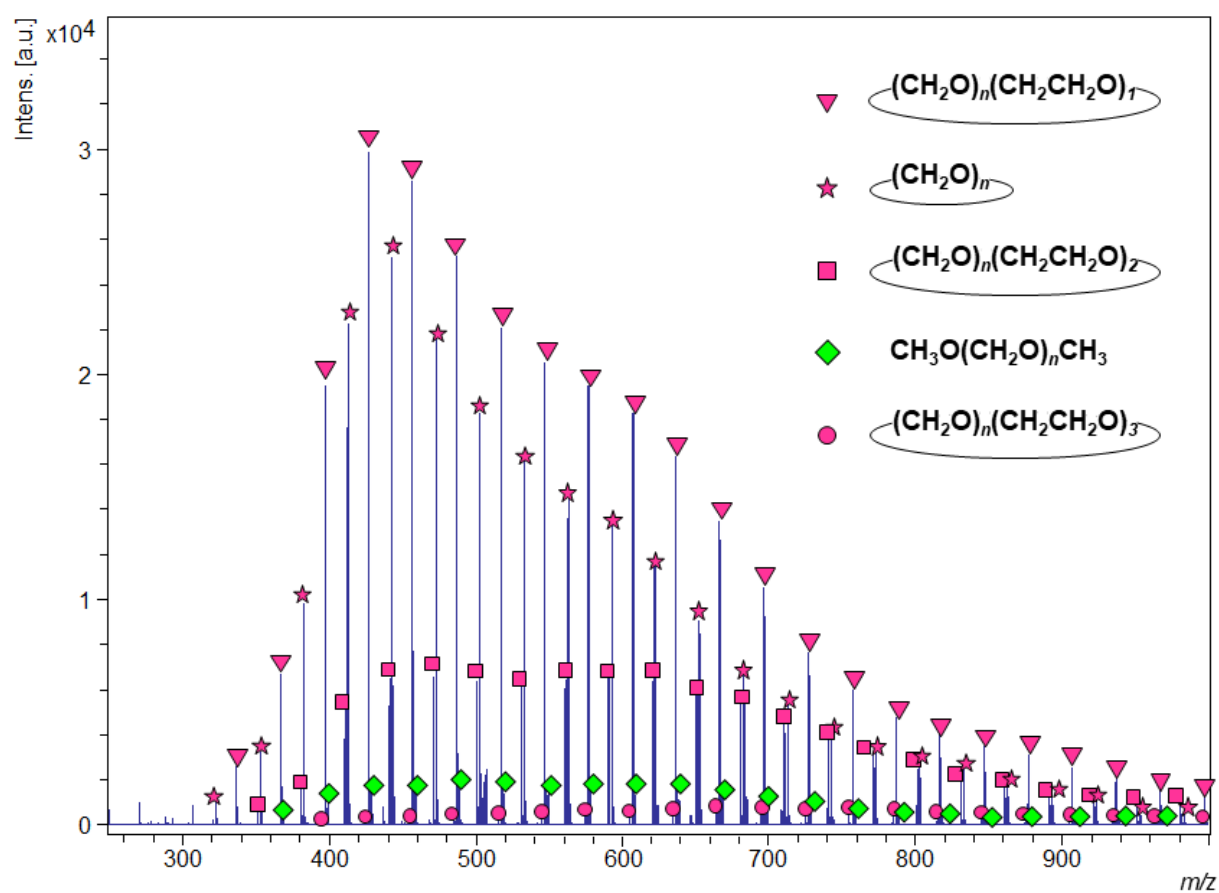

**Figure S2.** MALDI-TOF-MS spectrum of a POM copolymer sample obtained under conditions similar to those for molten-state homopolymerization of TOX (initial feed ratio: TOX = 96 mol%, 1,3-dioxolane = 4 mol%):  $[\text{catalyst}]_0/[\text{monomer}]_0 = 7 \times 10^{-5}$ , for 30 s, at 90 °C.

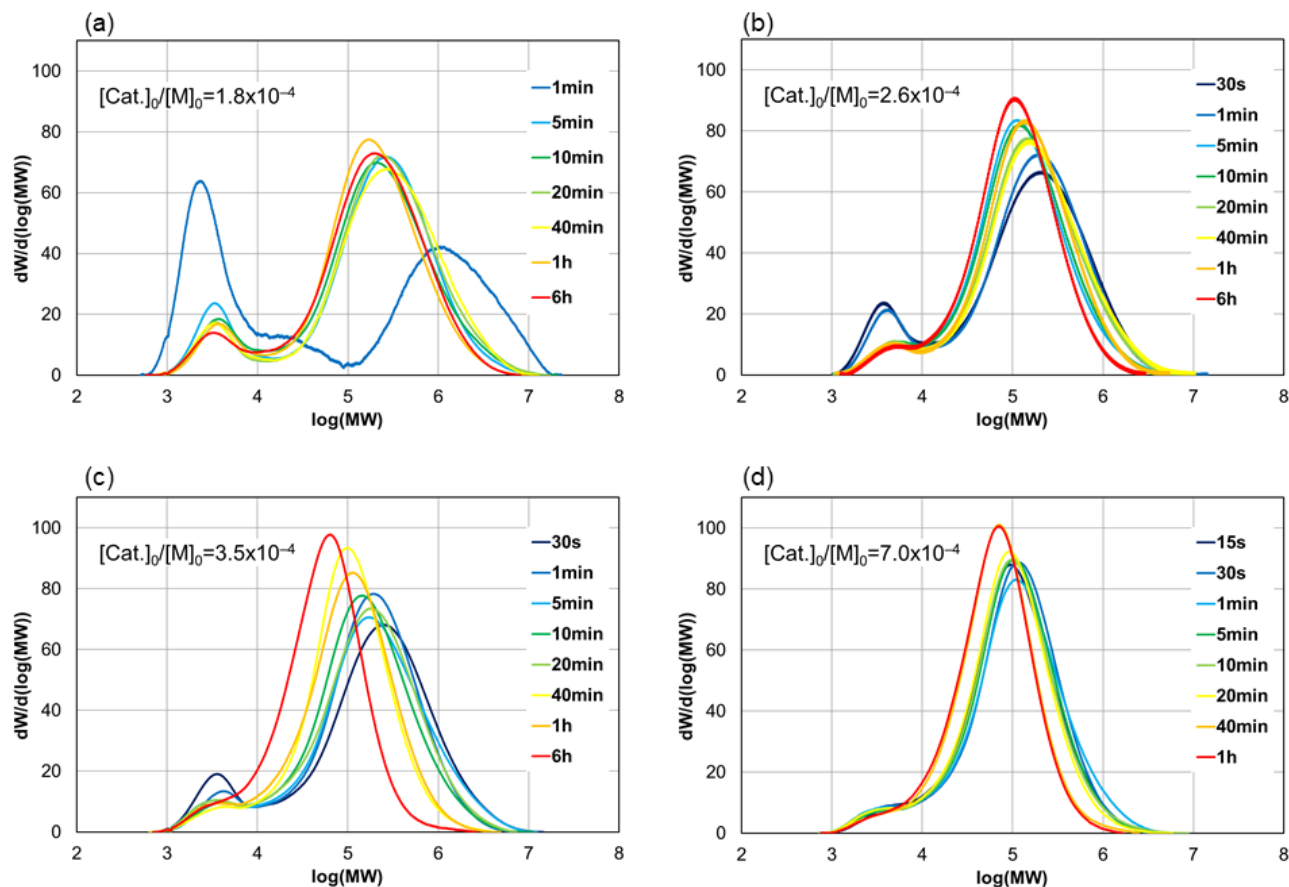

**Figure S3.** MWD curves of the polymers obtained in the molten-state polymerization of TOX:  $[catalyst]_0/[monomer]_0 =$  (a)  $1.8 \times 10^{-4}$ , (b)  $2.6 \times 10^{-4}$  (the same data as those shown in Figure 4(c)), (c)  $3.5 \times 10^{-4}$ , or (d)  $7.0 \times 10^{-4}$ , for 15 s—6 h, at 90 °C.

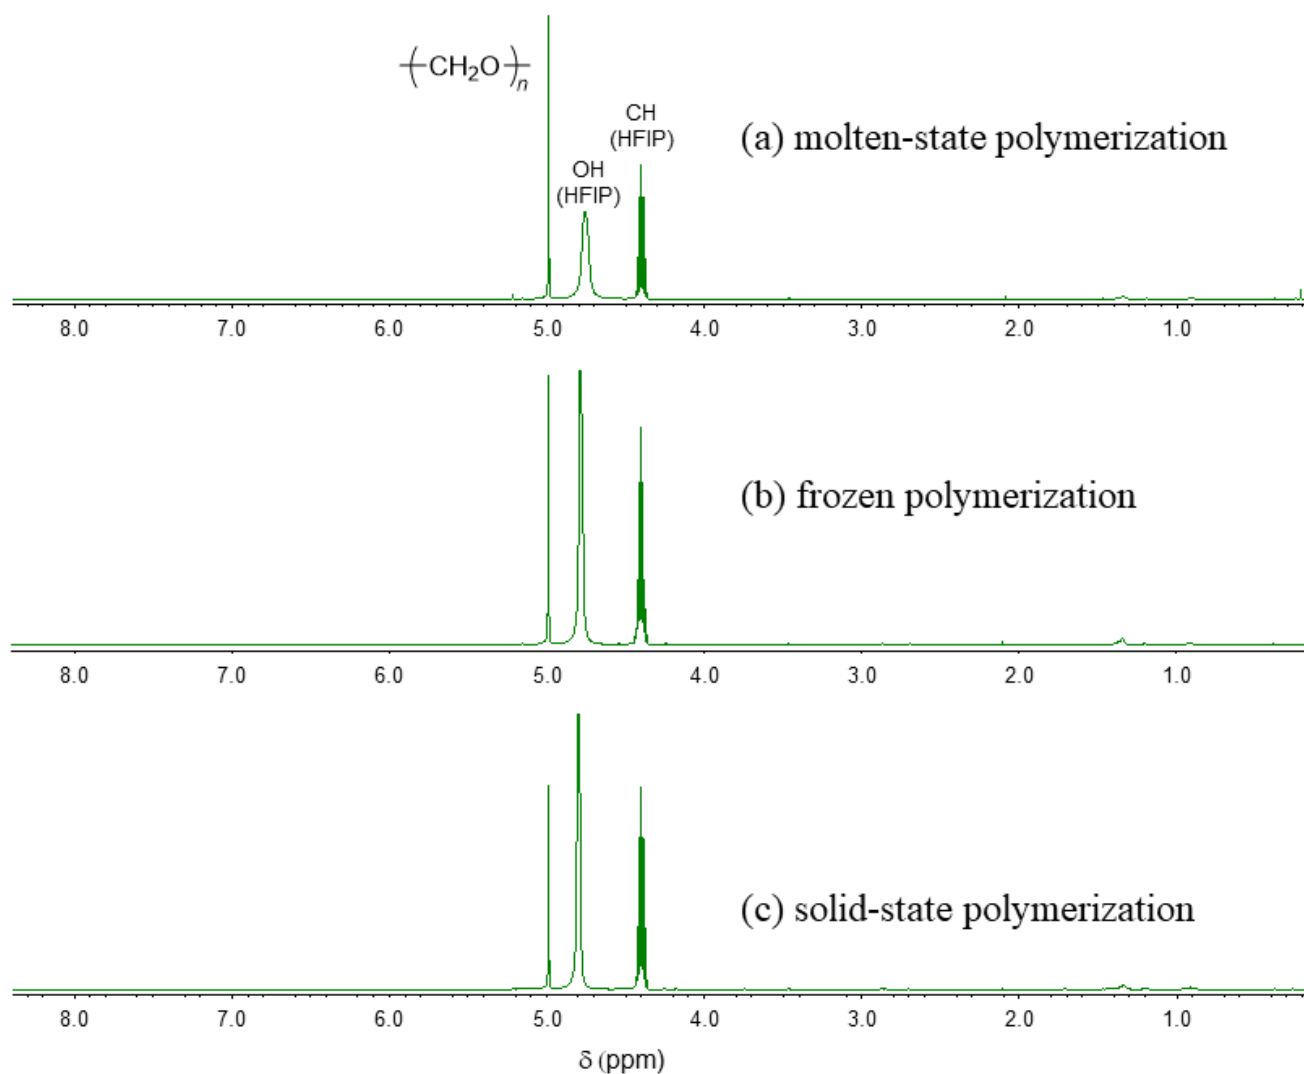

**Figure S4.**  $^1\text{H}$  NMR spectra of the polymers obtained in (a) molten-state polymerization (polymerization temperature: 90 °C), (b) frozen polymerization (90 °C  $\rightarrow$  4 °C), and solid-state polymerization (50 °C):  $[\text{catalyst}]_0/[\text{monomer}]_0 = 2.6 \times 10^{-4}$ , for 30 min.

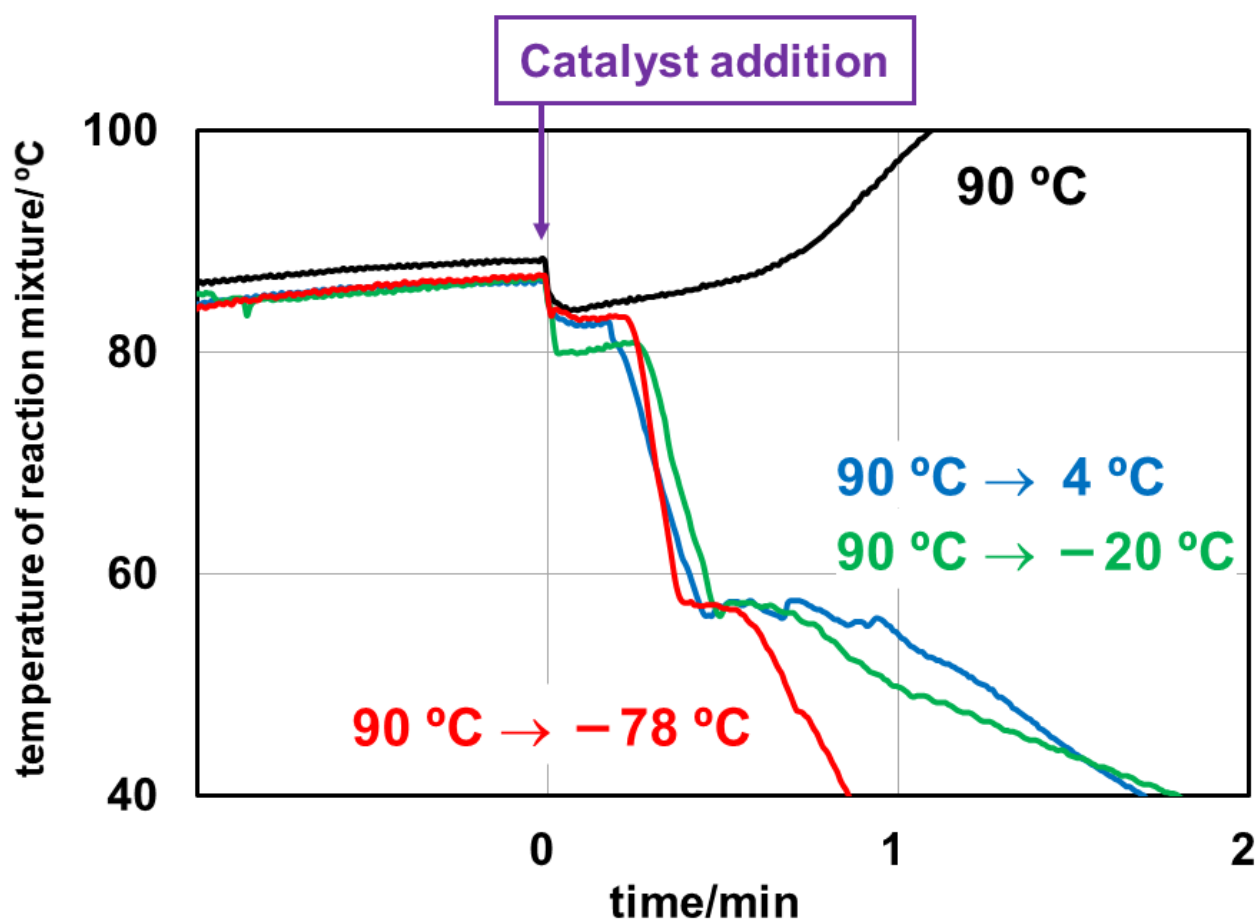

**Figure S5.** Enlarged view of temperature transition in polymerization systems:  $[\text{catalyst}]_0/[\text{monomer}]_0 = 2.6 \times 10^{-4}$ , for 30 min, Initial temperature (oil bath): 90 °C. The same data as those shown in Figure 3.

**Table S1.** Reproducibility of molten-state polymerization and frozen polymerization<sup>a</sup>

| Entry | Polymerization temperature                          | Yield | Oligomer ratio | $M_w$<br>( $\times 10^6$ ) | $M_p$<br>( $\times 10^6$ ) | $M_w/M_n$ | $T_m$  |
|-------|-----------------------------------------------------|-------|----------------|----------------------------|----------------------------|-----------|--------|
| 1     | 90 °C<br>(molten-state polymerization)              | 89 %  | 6.5 %          | 0.16                       | 0.10                       | 5.2       | 183 °C |
| 2     |                                                     | 86 %  | 6.5 %          | 0.20                       | 0.11                       | 6.1       | 181 °C |
| 3     |                                                     | 89 %  | 6.5 %          | 0.22                       | 0.13                       | 6.8       | 182 °C |
| 4     |                                                     | 88 %  | 7.5 %          | 0.24                       | 0.14                       | 8.0       | 181 °C |
| 5     |                                                     | 84 %  | 6.8 %          | 0.22                       | 0.14                       | 7.0       | 182 °C |
| 6     | 90 °C $\rightarrow$ 4 °C<br>(frozen polymerization) | 58 %  | 5.8 %          | 0.88                       | 0.41                       | 25        | 188 °C |
| 7     |                                                     | 85 %  | 5.4 %          | 1.2                        | 0.54                       | 30        | 188 °C |
| 8     |                                                     | 85 %  | 4.8 %          | 1.1                        | 0.49                       | 26        | 190 °C |
| 9     |                                                     | 78 %  | 5.2 %          | 1.0                        | 0.50                       | 28        | 189 °C |
| 10    |                                                     | 86 %  | 5.3 %          | 1.1                        | 0.59                       | 29        | 188 °C |

<sup>a</sup> [catalyst]<sub>0</sub>/[monomer]<sub>0</sub> =  $2.6 \times 10^{-4}$ , for 30 min.

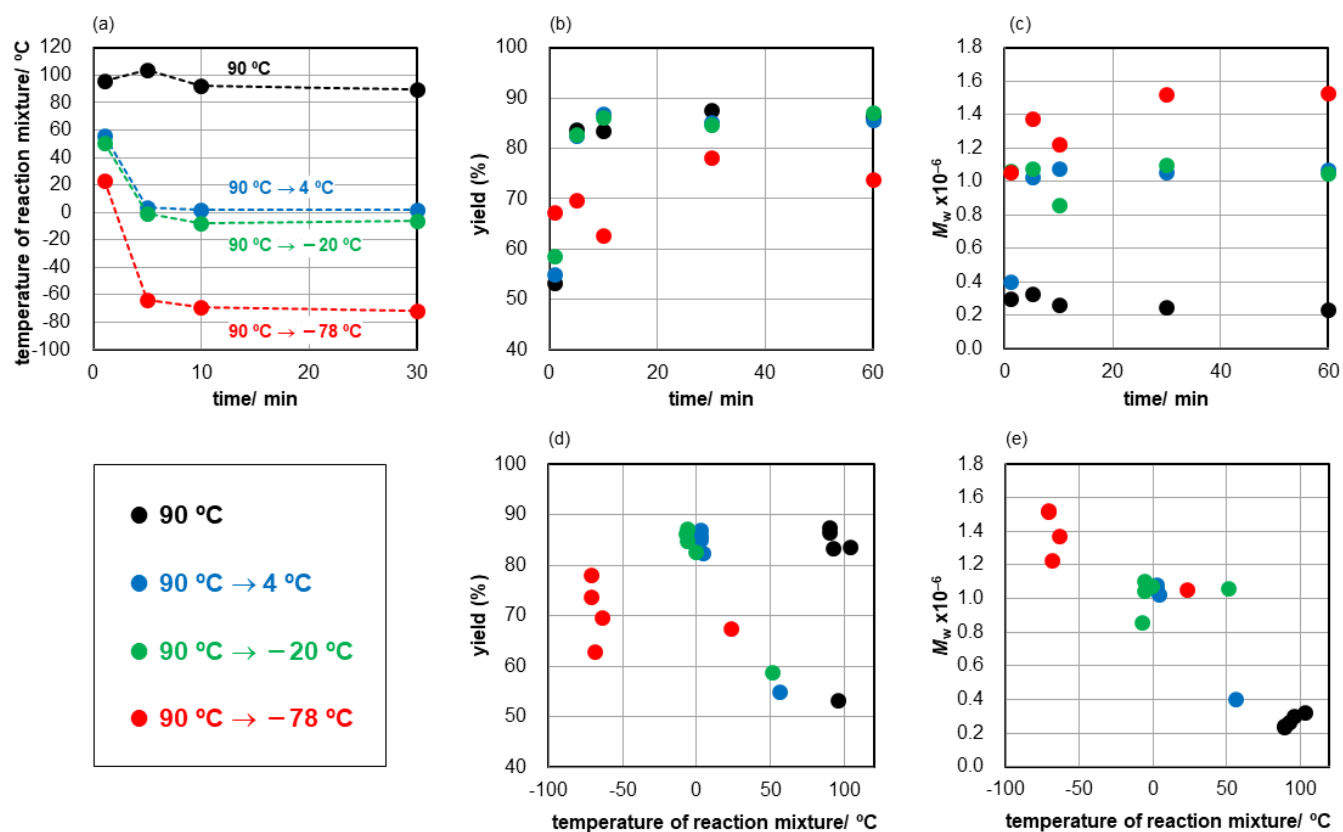

**Figure S6.** The relationships between (a) reaction time and temperature of reaction mixture; (b) reaction time and yield; (c) reaction time and  $M_w$ ; (d) temperature of reaction mixture and yield; and (e) temperature of reaction mixture and  $M_w$  in the molten-state polymerization and frozen polymerization of TOX:  $[\text{catalyst}]_0/[\text{monomer}]_0 = 2.6 \times 10^{-4}$ , for 1—60 min.

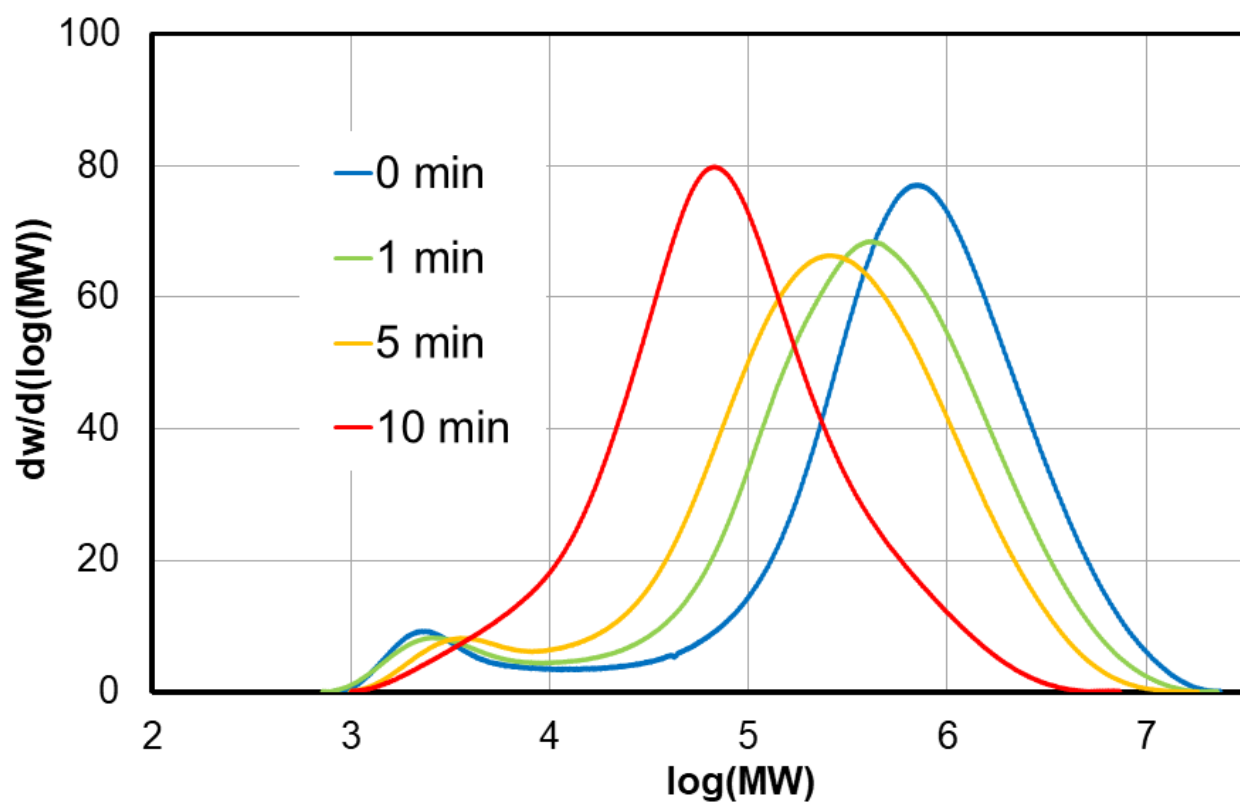

**Figure S7.** MWD curves of the polymers obtained by heating the reaction mixture for 1—10 min at 140 °C without quenching frozen polymerization of TOX:  $[\text{catalyst}]_0/[\text{monomer}]_0 = 2.6 \times 10^{-4}$ , frozen polymerization was conducted at 4 °C.

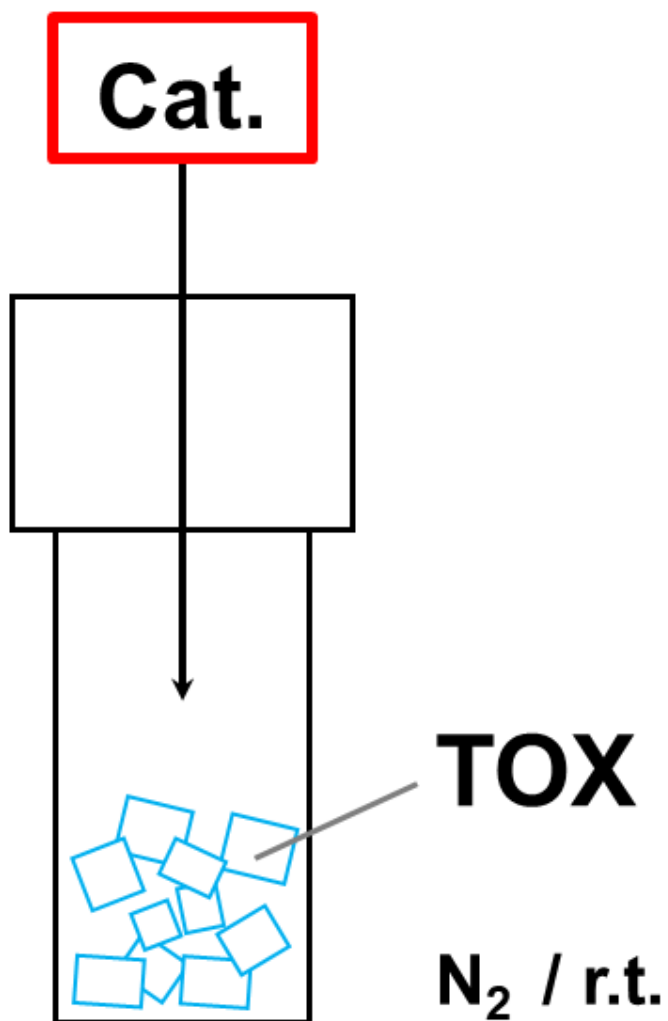

**Figure S8.** The experimental method of solid-state polymerization.

(a) Two-dimensional pattern of WAXS

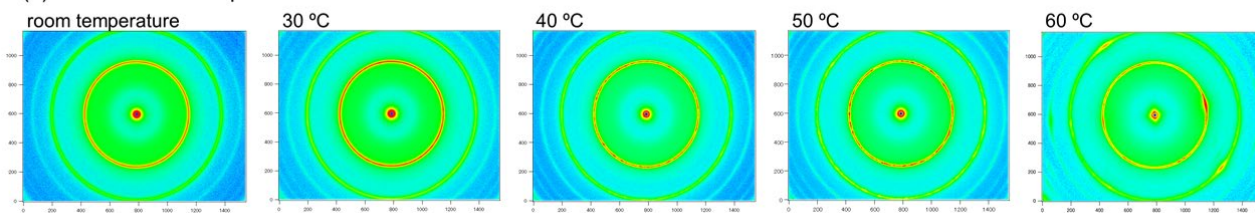

(b) Two-dimensional pattern of SAXS

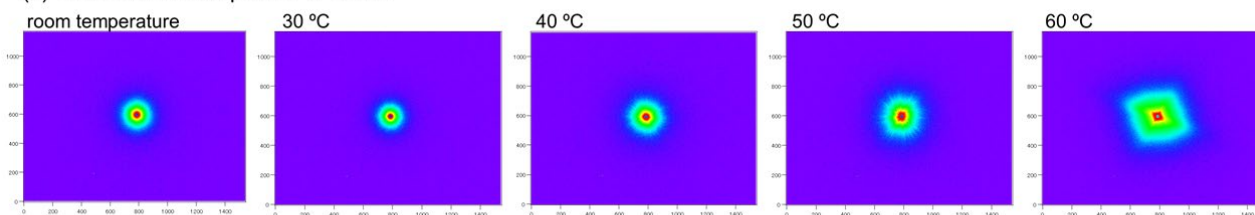

**Figure S9.** Two-dimensional pattern of (a) WAXS and (b) SAXS of the polymers obtained in the solid-state polymerization:  $[\text{catalyst}]_0/[\text{monomer}]_0 = 2.6 \times 10^{-4}$ , for 30 min, at room temperature—60 °C.

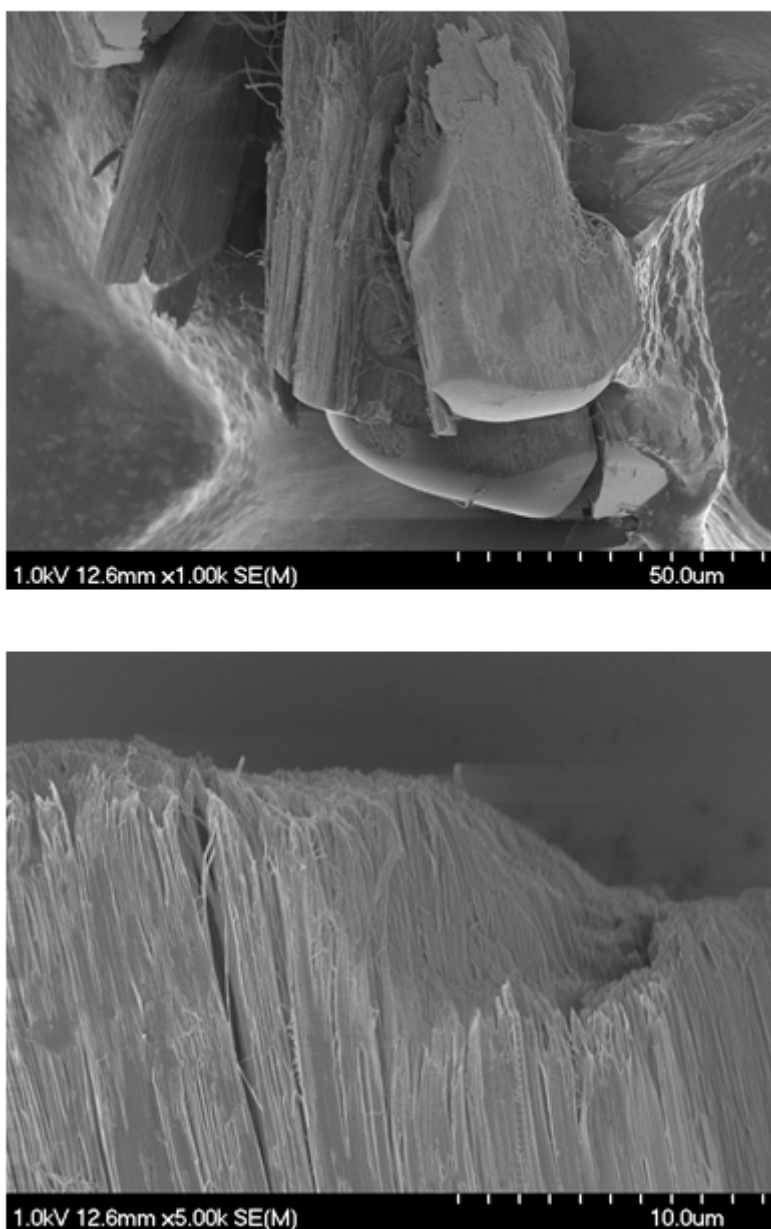

**Figure S10.** SEM images of the polymers obtained in the solid-state polymerization (50 °C):  $[\text{catalyst}]_0/[\text{monomer}]_0 = 2.6 \times 10^{-4}$ , for 30 min.
